# Supplementary material for: One pot synthesis of mesoporous boron nitride using polystyrene-b-poly(ethylene oxide) block copolymer
Source: Royal Society of Chemistry journal article supplement (doi:10.1039/c4ra11431k), 2014-12-16
Supplement: c4ra11431k1.pdf [file c4ra11431k1.pdf]

Electronic Supplementary Material (ESI) for RSC Advances.  
This journal is © The Royal Society of Chemistry 2014

## Supplementary Information†

### One Pot Synthesis of Mesoporous Boron Nitride Using Polystyrene- b-Poly(ethylene Oxide) Block Copolymer

Mahdi Maleki,<sup>\*a,b</sup> Ali Beitollahi,<sup>\*a</sup> Jinwoo lee,<sup>b</sup> Mohammadreza Shokouhimehr,<sup>c</sup> Jafar Javadpour,<sup>a</sup> Eun Ju Park,<sup>d</sup> Jinyoung Chun,<sup>b</sup> and Jongkook Hwang<sup>b</sup>

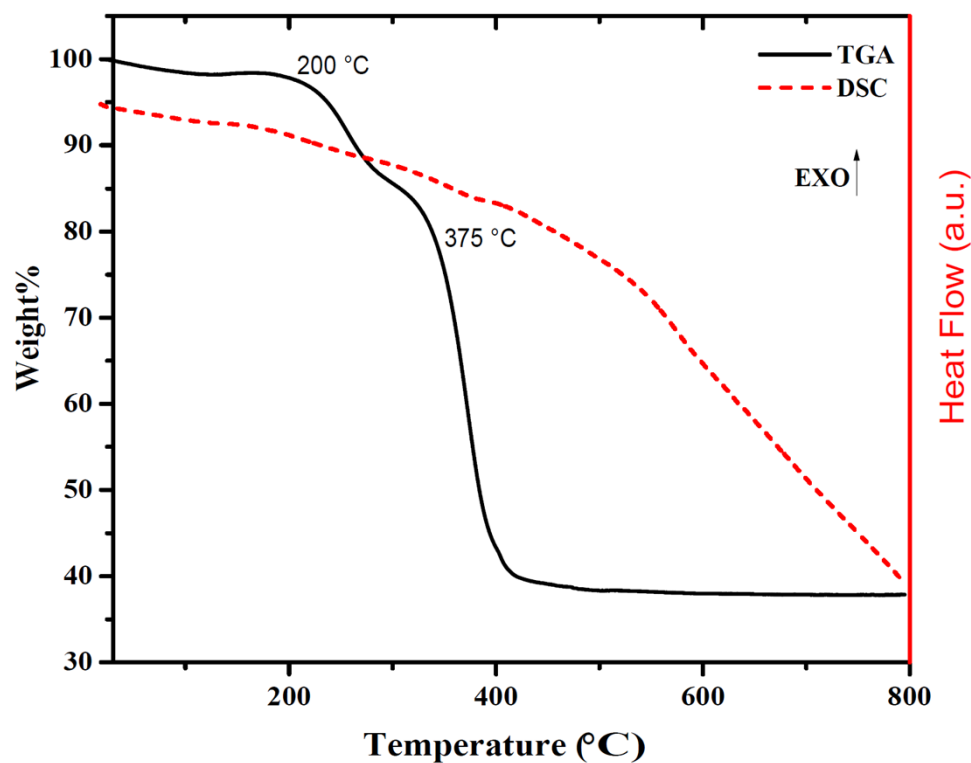

**Fig. S1** TGA/DSC results for AB/PSE hybrid after heating at 100°C (24 h) under N<sub>2</sub> atmosphere, 3°C/min.
